# Supplementary material
Source: PubMed Central journal article supplement (PMC7682758)
Supplement: 216_2020_3081_MOESM1_ESM.pdf [file 216_2020_3081_MOESM1_ESM.pdf]

## Supplementary Information

# Specific and sensitive detection of Influenza A virus using a biotin-coated nanoparticle enhanced immunomagnetic assay

Carole Farre<sup>1</sup>, Sara Viezzi<sup>1,2</sup>, Alice Wright<sup>1</sup>, Perrine Robin<sup>1</sup>, Nathalie Lejal<sup>3</sup>, Marisa Manzano<sup>2</sup>, Jasmina Vidic<sup>4</sup>, Carole Chaix<sup>1</sup>

<sup>1</sup>Université de Lyon, CNRS, Université Claude Bernard Lyon 1, Institut des Sciences Analytiques, UMR 5280, 5 rue de la Doua, 69100 Villeurbanne, France

<sup>2</sup>Università degli Studi di Udine, Dipartimento di Scienze Agro-Alimentari, Ambientali e Animali, via Sondrio 2/A, 33100 Udine, Italy

<sup>3</sup>Université Paris-Saclay, UR892, INRAE, 78350 Jouy-en-Josas, France

<sup>4</sup>Université Paris-Saclay, INRAE, AgroParisTech, Micalis Institute, 78350 Jouy-en-Josas, France

### *Biotin-nanoparticle release from the CPG support*

After DNA synthesis, the ratio of DNA per NP was estimated by UV-visible measurement (Varian Cary 100 Bio UV-visible spectrophotometer (Agilent Technologies)) using a quartz cuvette of 1cm path length.

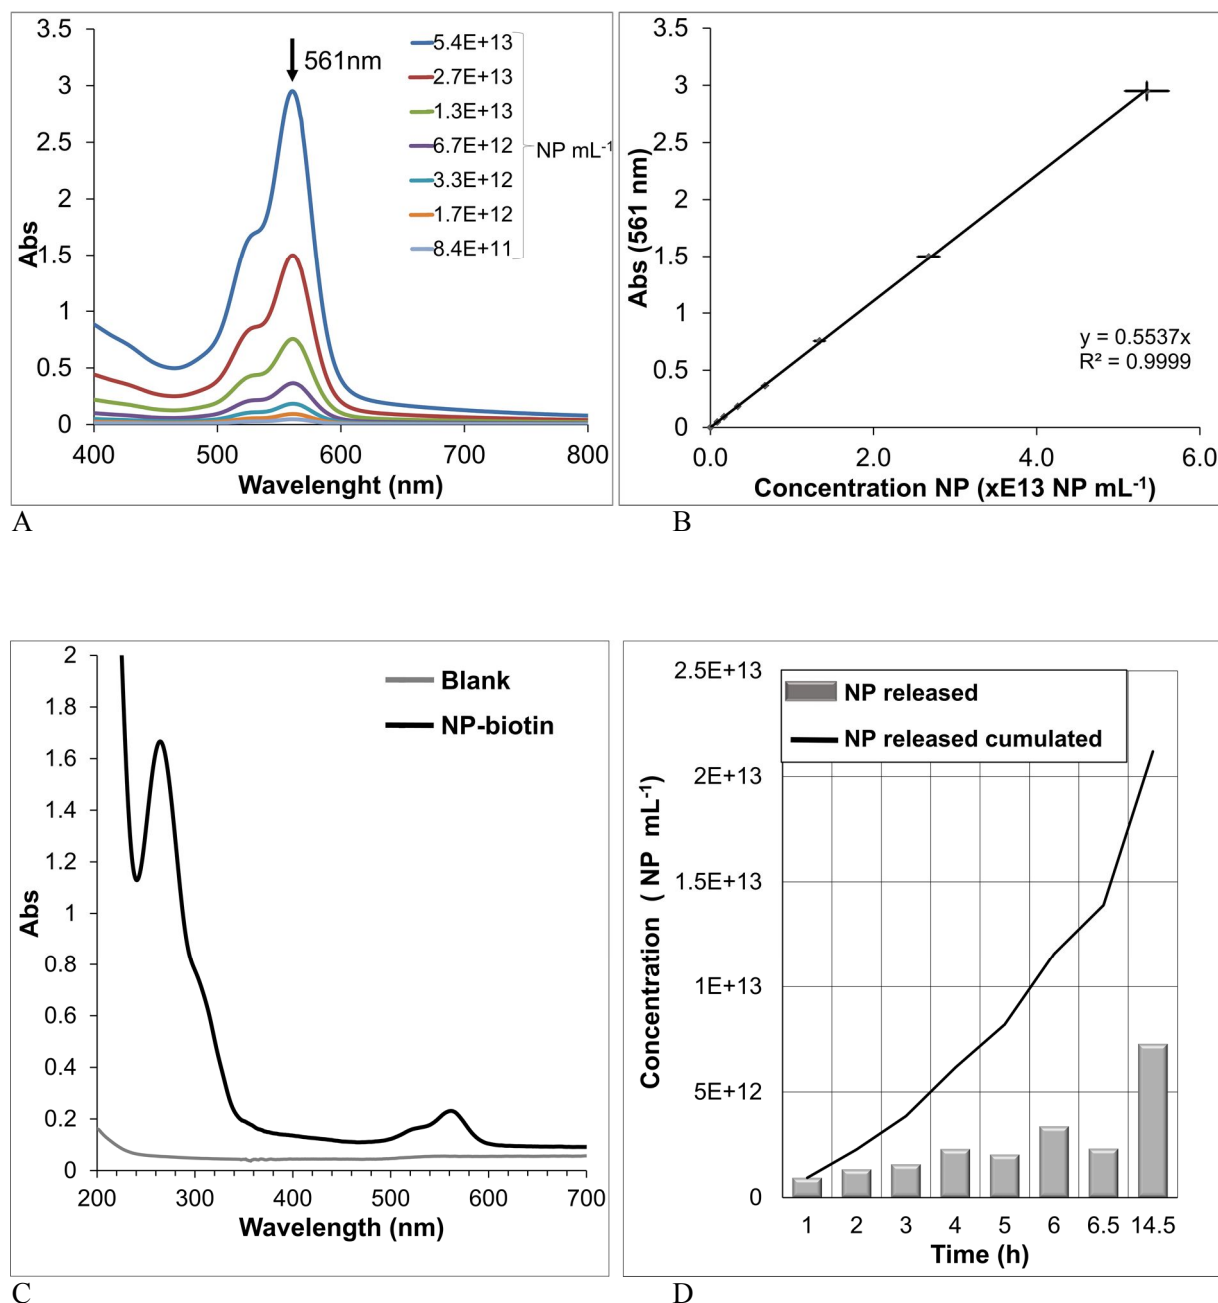

**Fig. S1** A) UV spectra obtained with Varian Cary 100 Bio UV-visible spectrophotometer B) calibration curve of biotin-NP at 561nm C) UV- spectra obtained after NP release D) NP release kinetics, each sample or cumulated curves

### *Size characterization*

Dynamic Light Scattering (DLS) measurements were carried out with a Zetasizer nanoZS (Malvern) in water. After functionalization, the hydrodynamic diameter was superior due to the spacer arm DNA synthesized on the surface.

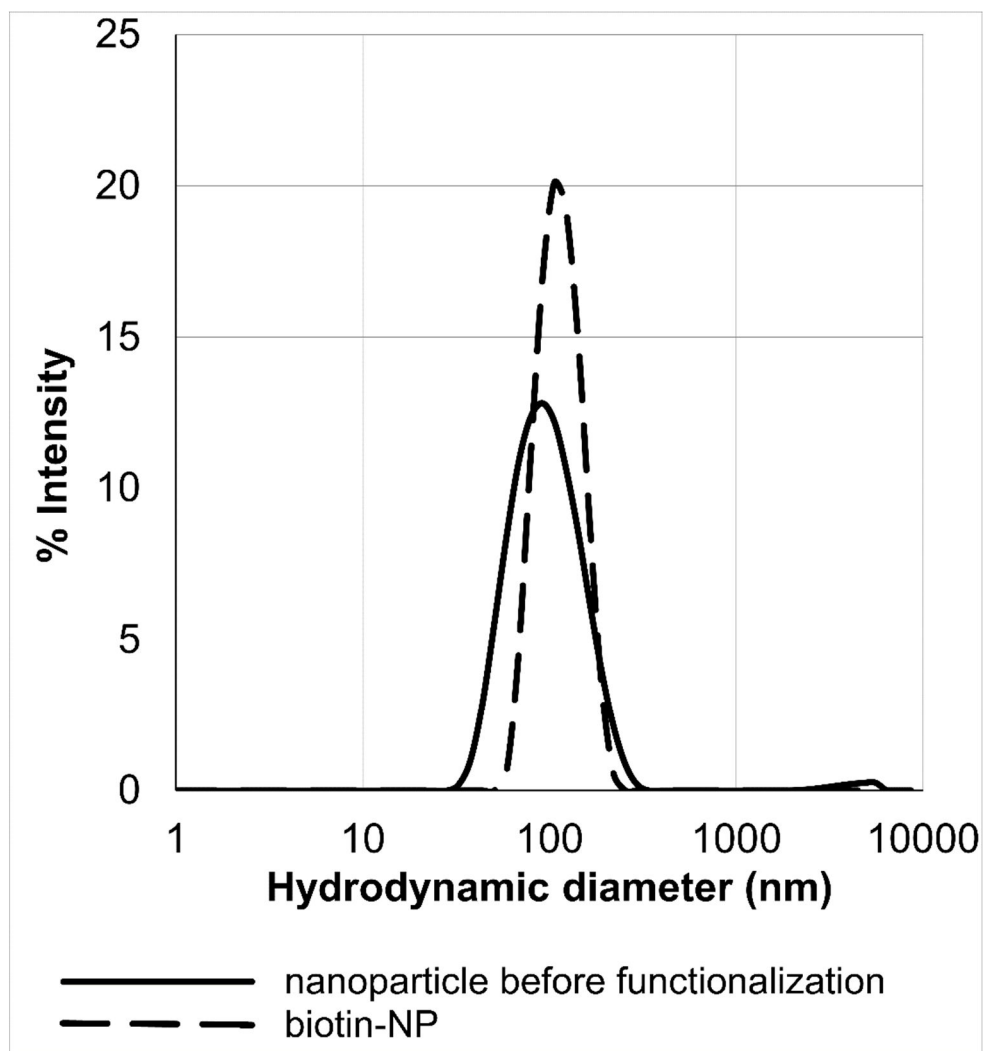

Fig. S2 DLS of biotin-NPs before and after functionalization

*MELISA protocol optimization for NuP detection*

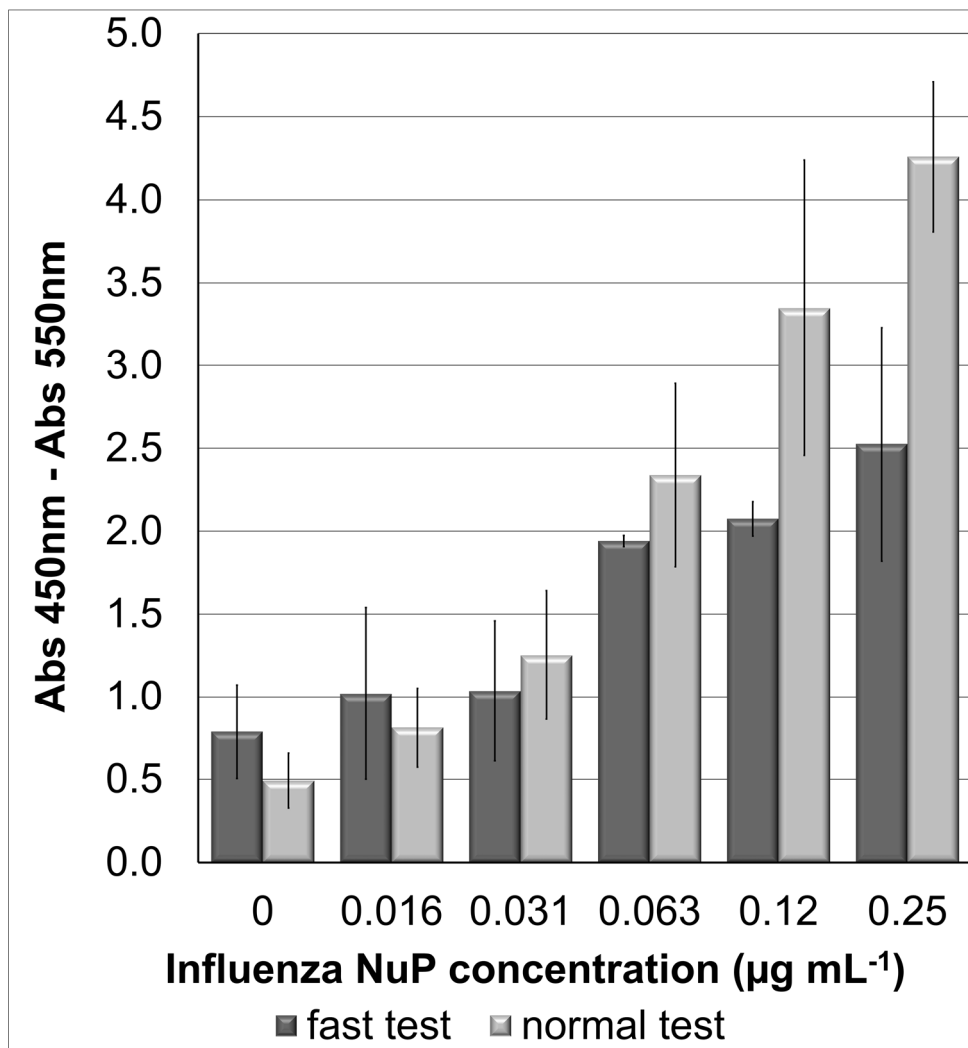

**Fig. S3** Optimization of MELISA assay for NuP detection. Two different incubation times (30 and 60 min) were tested with different NuP concentrations

***Biotin labeled nanoparticle synthesis : Nano-On-Micro (NOM) support characterization***

Scanning electron microscopy (SEM) was performed to characterize Controlled Pore Glass-NP assemblies, at an acceleration voltage of 10kV using a VEGA TESCAN SEM. Before analysis, samples were metallized with 5 nm thickness of gold.

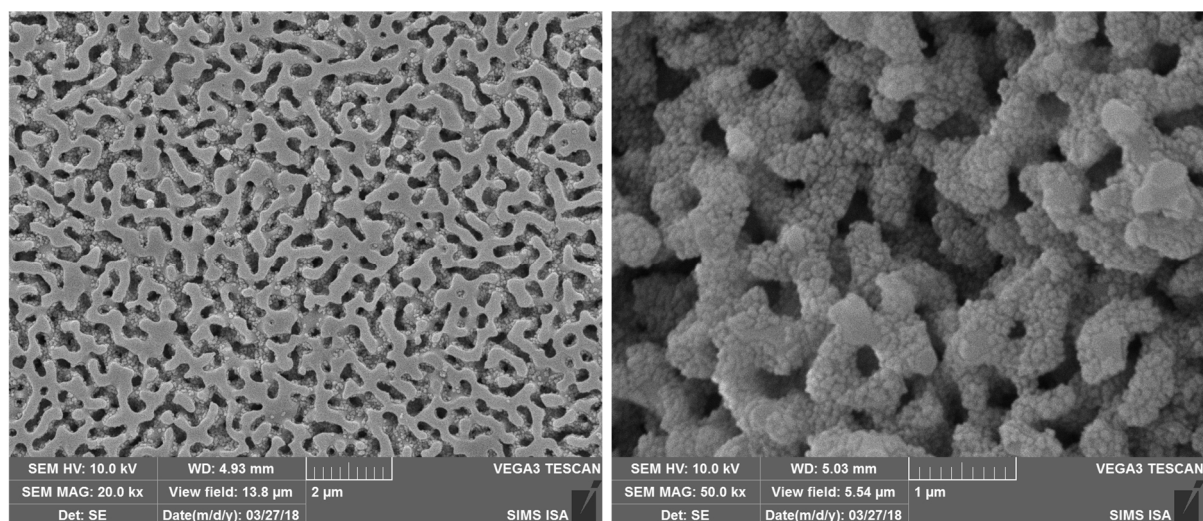

**Fig. S4** SEM images of the CPG functionalized with NPs (nano-on-micro (NOM) support)

### SPR characterization of biotin-NPs

Surface Plasmon Resonance was recorded with a SPR Navi 200 (Bionavis, Finland). The coated gold chip was positioned in the SPR cell and primed with a circulating NaCl 0.15 M solution at  $50 \mu\text{L min}^{-1}$ . A multilayer of polyelectrolyte was assembled on the surface by successive additions of opposite charge polyelectrolytes (PEI (poly(ethyleneimine)); PSS (poly(styrenesulfonic acid)); PAH (poly(allylamine)))  $0.1 \text{ mg mL}^{-1}$  in NaCl 0.15 M. Then in one channel, avidin ( $1 \mu\text{g mL}^{-1}$  in NaCl 0.15 M) was added, and in the other channel, NaCl 0.15 M was injected. After a passivation step with DNA dT12 ( $1 \text{ nM}$  in NaCl 0.15 M), biotin-NP suspension was added. The biotin-NP were specifically captured on the avidin-coated chip surface as proven by the increase of the SPR angle at 55 min (Fig. S5A).

The chip was then removed from the SPR and directly observed with a fluorescence optical microscope. We observe the immobilization of the fluorescent biotin-NP (with rhodamine in the NP core) on the gold surface used for SPR (Fig. S5B).

A

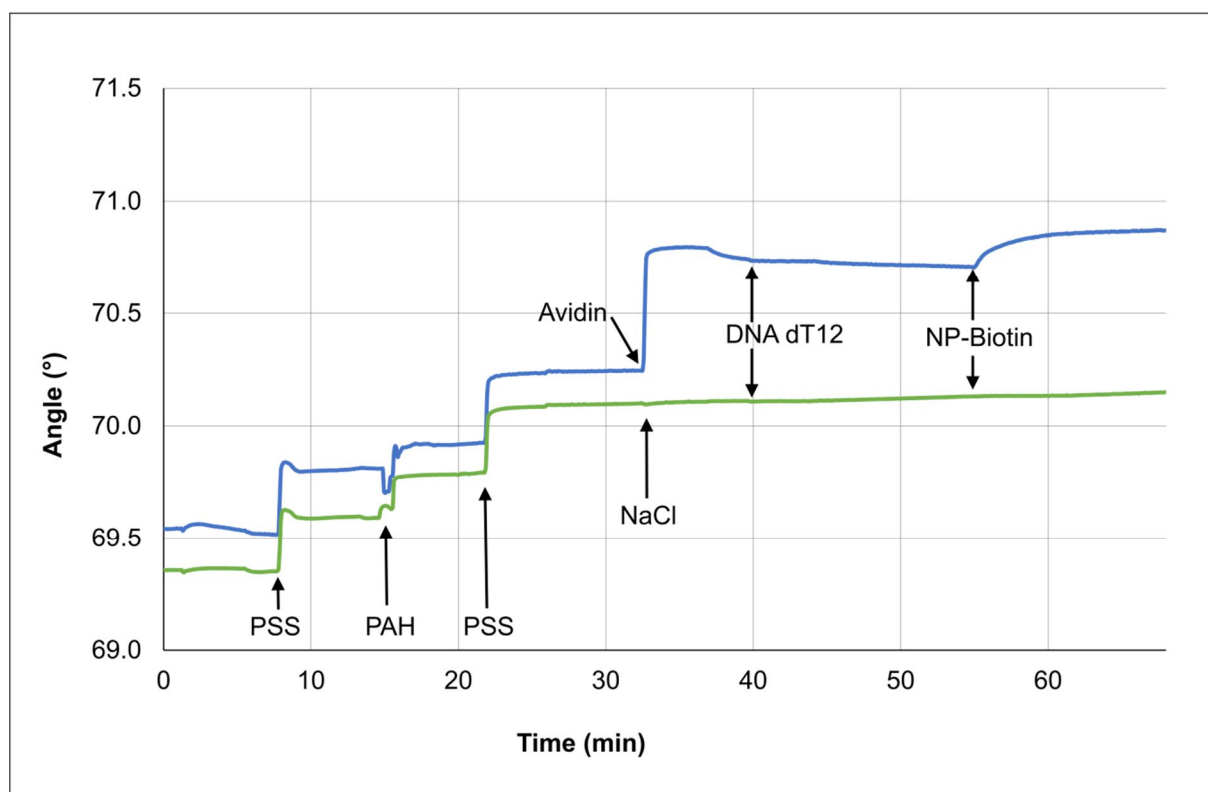

**B**

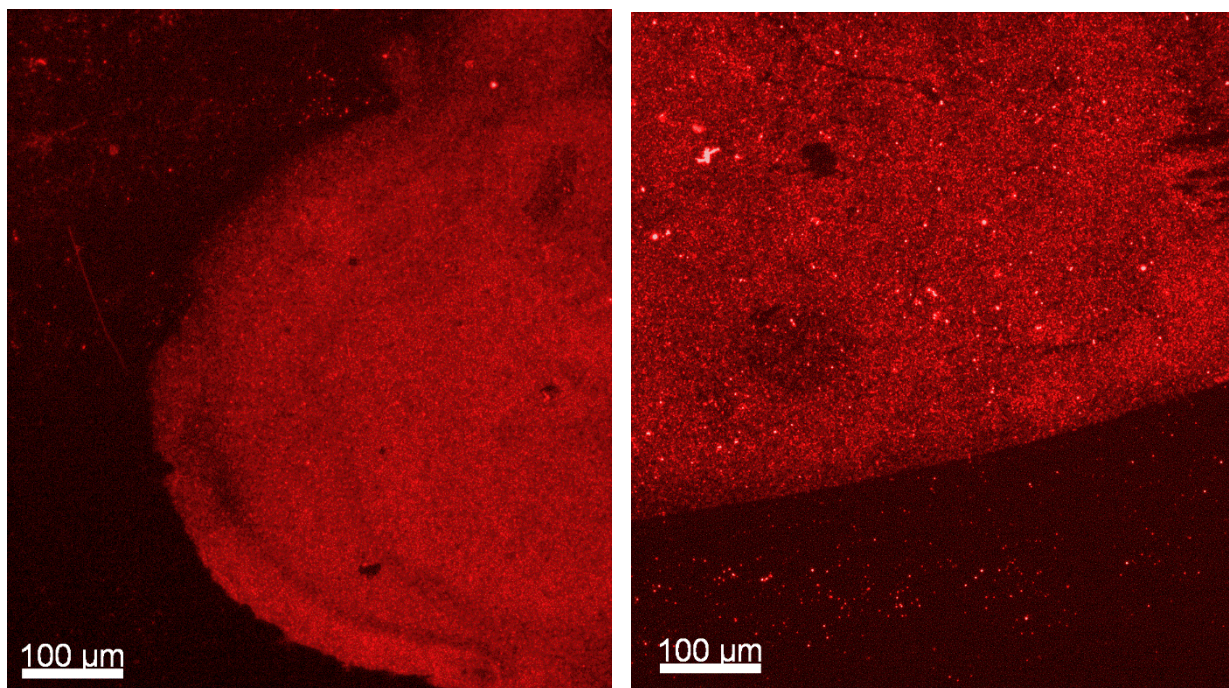

**Fig. S5** A) SPR characterization of the biotin-NP specific capture on the avidin-functionalized surface  
B) Photos by fluorescence microscopy of the gold surface after SPR
